# Supplementary material for: Leveraging genetic diversity to identify small molecules that reverse mouse skeletal muscle insulin resistance
Source: eLife. 2023 Jul 26;12:RP86961. doi: 10.7554/eLife.86961 (PMC10371229; doi:10.7554/eLife.86961)
Supplement: Supplementary file 1. [file elife-86961-supp1.xlsx]

## Sheet: Sheet1
Symbol	Protein	Matsuda Index Effect size
Mtpn	Myotrophin	-1.15
Cmpk1	Cytidine monophosphate (UMP-CMP) kinase 1	-1
Tbca	Tubulin cofactor A	-0.92
Pdcd5	Programmed cell death 5	-0.92
Pgls	6-phosphogluconolactonase	-0.75
S100a6	S100 calcium binding protein A6 (calcyclin)	-0.75
Ndrg2	N-myc downstream regulated gene 2	-0.72
Anxa3	Annexin A3	-0.68
Dynll2	Dynein light chain LC8-type 2	-0.66
Cltc	Clathrin, heavy polypeptide (Hc)	-0.66
Lamtor5	Late endosomal/lysosomal adaptor, MAPK and MTOR activator 5	-0.63
Fabp5	Fatty acid binding protein 5, epidermal	-0.62
Tsc22d1	TSC22 domain family, member 1	-0.58
S100a10	S100 calcium binding protein A10 (calpactin)	-0.58
Psma2	Proteasome subunit alpha 2	-0.57
Gamt	Guanidinoacetate methyltransferase	-0.49
Sgcg	Sarcoglycan, gamma (dystrophin-associated glycoprotein)	-0.49
Rap2c	RAP2C, member of RAS oncogene family	-0.49
Letm1	Leucine zipper-EF-hand containing transmembrane protein 1	-0.48
Psmg3	Proteasome (prosome, macropain) assembly chaperone 3	-0.48
Cp	Ceruloplasmin	-0.47
Phkb	Phosphorylase kinase beta	-0.43
Dnajb4	DnaJ heat shock protein family (Hsp40) member B4	-0.41
Hspb2	Heat shock protein 2	-0.41
S100a11	S100 calcium binding protein A11	-0.39
Hspb3	Heat shock protein 3	-0.38
Clta	Clathrin, light polypeptide (Lca)	-0.36
Paics	Bifunctional Phosphoribosylaminoimidazole	-0.35
Wdsub1	WD repeat, SAM and U-box domain containing 1	-0.35
Clpp	Caseinolytic mitochondrial matrix peptidase proteolytic subunit	-0.35
Snap23	Synaptosomal-associated protein 23	-0.34
Adprhl1	ADP-ribosylhydrolase like 1	-0.34
Apoa4	Apolipoprotein A-IV	-0.32
Itih4	Inter alpha-trypsin inhibitor, heavy chain 4	-0.32
Jpt1	Jupiter microtubule associated homolog 1	-0.31
Rcn2	Reticulocalbin 2	-0.29
Aspa	Aspartoacylase	-0.29
Fbn1	Fibrillin 1	-0.28
Slc25a19	Solute carrier family 25 (mitochondrial thiamine pyrophosphate carrier), member 19	-0.26
S100a9	S100 calcium binding protein A9 (calgranulin B)	-0.18
Phgdh	3-phosphoglycerate dehydrogenase	-0.06
Atox1	Antioxidant 1 copper chaperone	-1.04
Pebp1	Phosphatidylethanolamine binding protein 1	-0.9
Lgals1	Lectin, galactose binding, soluble 1	-0.8
Nagk	N-acetylglucosamine kinase	-0.79
Lzic	Leucine zipper and CTNNBIP1 domain containing	-0.78
Anxa1	Annexin A1	-0.69
Pdxk	Pyridoxal (pyridoxine, vitamin B6) kinase	-0.68
Lta4h	Leukotriene A4 hydrolase	-0.64
Nudcd2	NudC domain containing 2	-0.63
Eps15	Epidermal growth factor receptor pathway substrate 15	-0.61
Gmfb	Glia maturation factor, beta	-0.61
Glrx	Glutaredoxin	-0.58
Lgalsl	Galectin like	-0.55
Irgq	Immunity-related GTPase family, Q	-0.51
Sod3	Superoxide dismutase 3, extracellular	-0.49
Arhgdib	Rho, GDP dissociation inhibitor (GDI) beta	-0.46
Abhd14b	Abhydrolase domain containing 14b	-0.44
Nqo1	NAD(P)H dehydrogenase, quinone 1	-0.44
Cstb	Cystatin B	-0.43
Adi1	Acireductone dioxygenase 1	-0.4
Cpq	Carboxypeptidase Q	-0.39
Anxa4	Annexin A4	-0.38
Npl	N-acetylneuraminate pyruvate lyase	-0.34
Gda	Guanine Deaminase	-0.3
Hint2	Histidine triad nucleotide binding protein 2	-0.28
Serpina1d	Serine (or cysteine) peptidase inhibitor, clade A, member 1D	-0.26
Suox	Sulfite oxidase	-0.25
Cpne1	Copine I	-0.76
Acyp2	Acylphosphatase 2, muscle type	-0.7
Gnpda1	Glucosamine-6-phosphate deaminase 1	-0.54
Hpx	Hemopexin	-0.47
Nqo2	N-ribosyldihydronicotinamide quinone reductase 2	-0.36
Gss	Glutathione synthetase	-0.32
Serpina1b	Serine (or cysteine) preptidase inhibitor, clade A, member 1B	-0.32
Cox17	Cytochrome c oxidase assembly protein 17, copper chaperone	-0.29
