# Supplementary figures and images for: Leveraging genetic diversity to identify small molecules that reverse mouse skeletal muscle insulin resistance
Source: eLife journal article supplement (doi:10.7554/elife.86961), 2023-05-10

Figure 6-source data

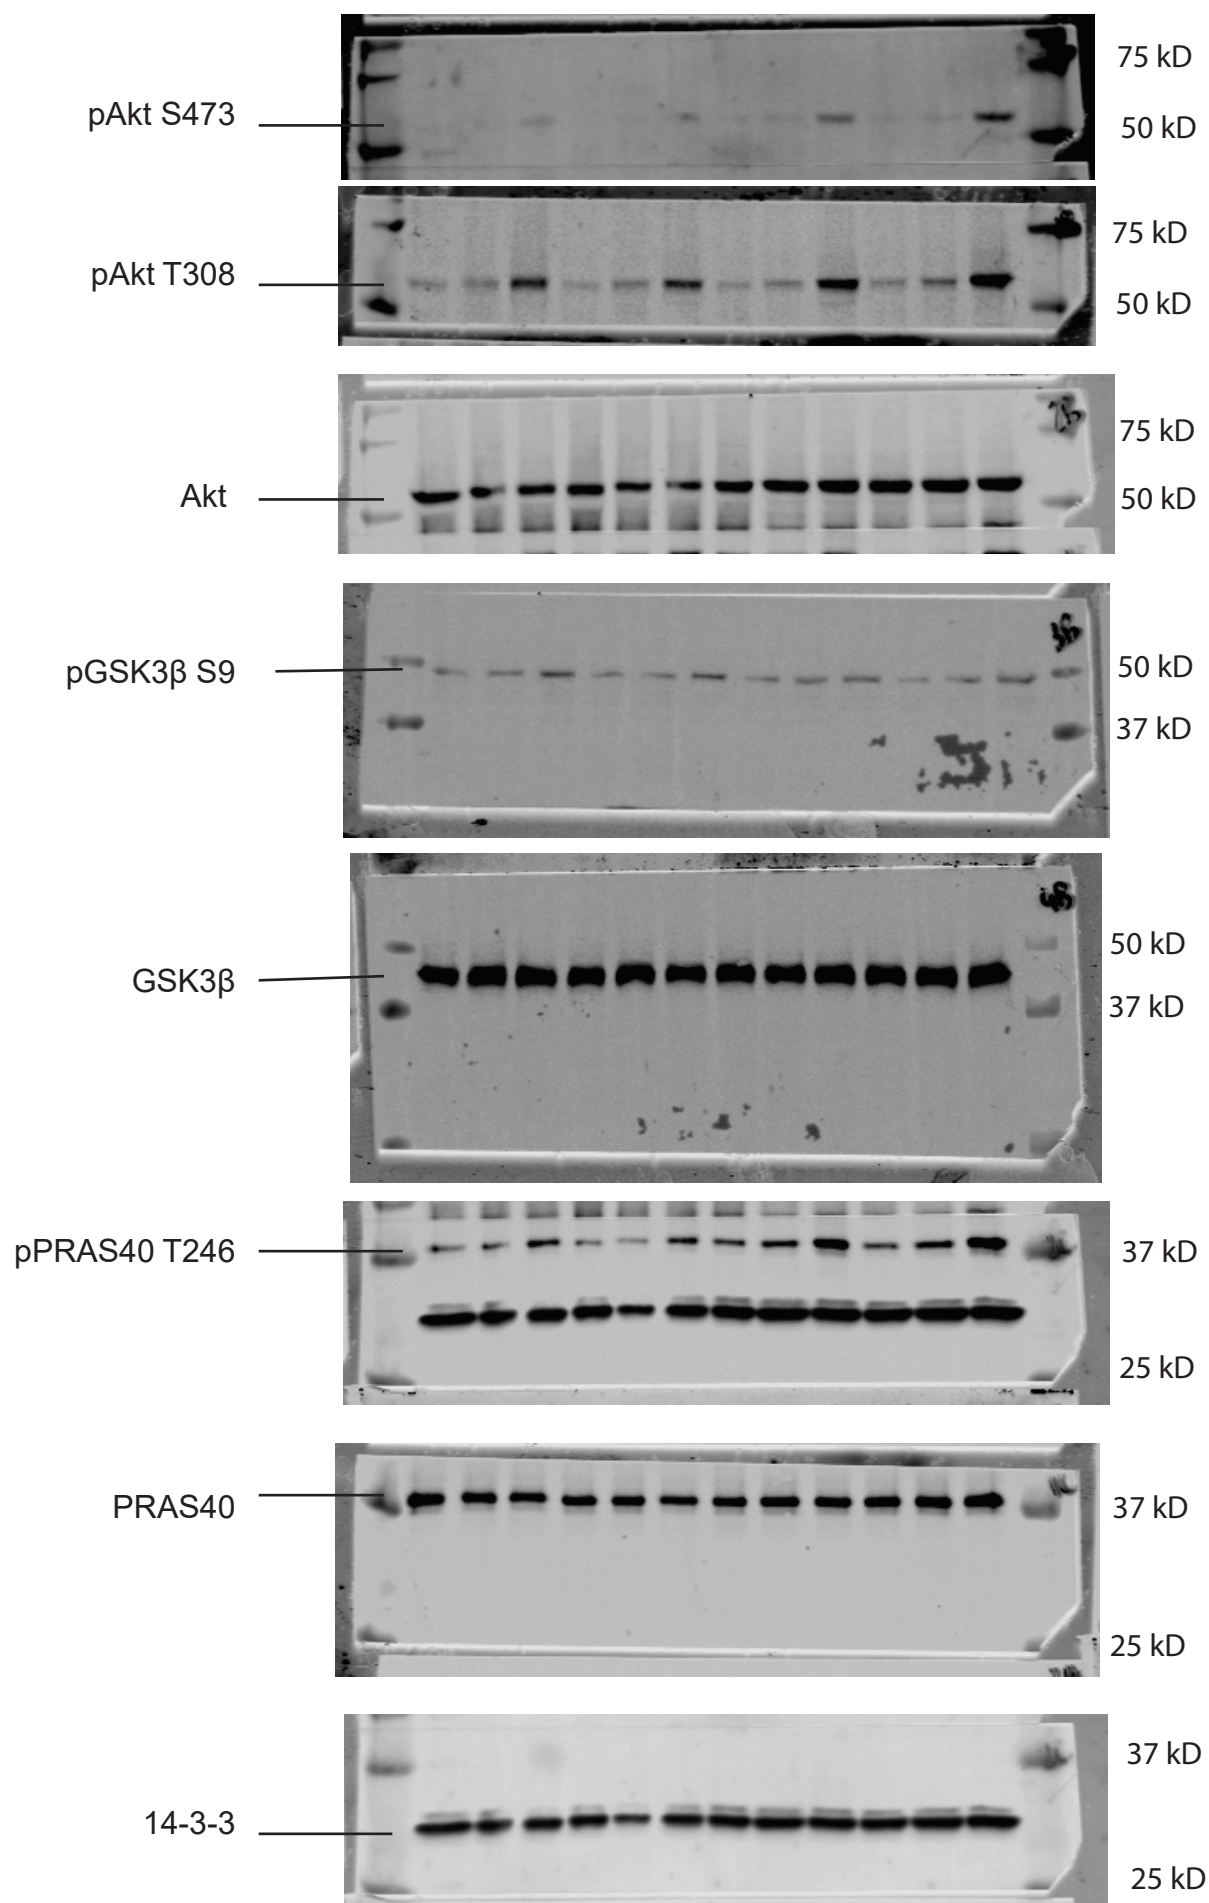

Supplement: fig6-data1 [file Figure 6-source data.pdf › Figure 6-source data.pdf]
